# Supplementary material for: Alternative Splicing of a Novel Inducible Exon Diversifies the CASK Guanylate Kinase Domain
Source: Hindawi journal article supplement (doi:10.1155/2012/816237), 2012-01-01
Supplement: f1 [file 816237.f1.pdf]

Supplementary Figure S1

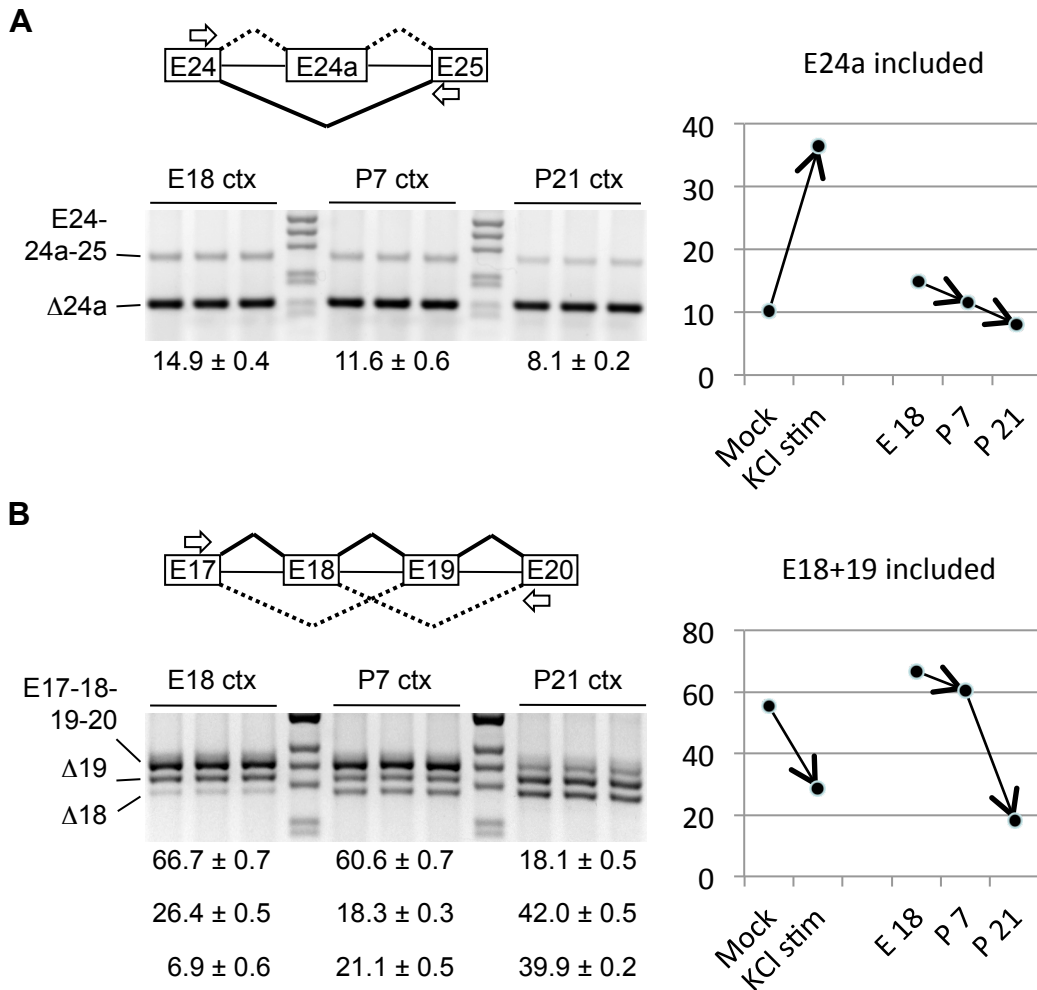

**Analysis of splicing patterns at distinct developmental stages reveals a decrease in E18, E19 and E24a inclusion with mouse development.** (A) Gel panel shows triplicate measurements for E24a included (E24-24a-25) and skipped (Δ24a) products for embryonic day 18 (E18 ctx), postnatal day 7 (P7 ctx) and 21 (P21 ctx) cerebral cortex using PCR primers as indicated in schematic. Lanes 4 and 8, 1 kb DNA ladder. Numbers below panel represent average % exon inclusion ± standard deviation. Graph displays % exon inclusion values (y-axis) for KCl stimulation and developmental series with arrows representing the overall effect on exon inclusion. (B) Same as (A), but for exons E18 and E19.
