# Supplementary material for: Alternative Splicing of a Novel Inducible Exon Diversifies the CASK Guanylate Kinase Domain
Source: Hindawi journal article supplement (doi:10.1155/2012/816237), 2012-01-01
Supplement: f2 [file 816237.f2.pdf]

Supplementary Figure S2

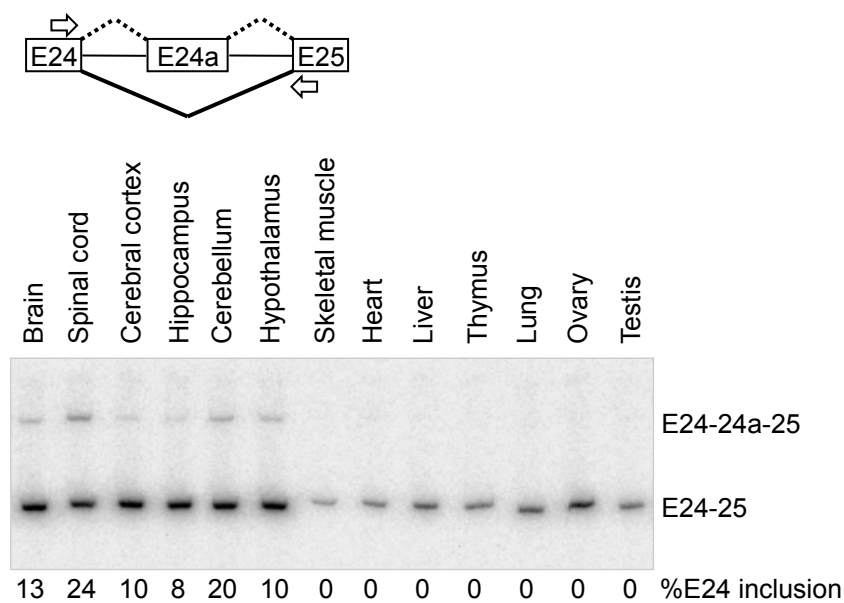

**Tissue-specific expression of CASK E24a.** RNA was isolated from adult mouse tissue as indicated and subjected to RT-PCR amplification using primers specific for E24 and E25 as shown in the schematic above. Percent E24a exon inclusion for individual cell types is indicated below the gel.
