# Supplementary material for: Alternative Splicing of a Novel Inducible Exon Diversifies the CASK Guanylate Kinase Domain
Source: Hindawi journal article supplement (doi:10.1155/2012/816237), 2012-01-01
Supplement: f3 [file 816237.f3.pdf]

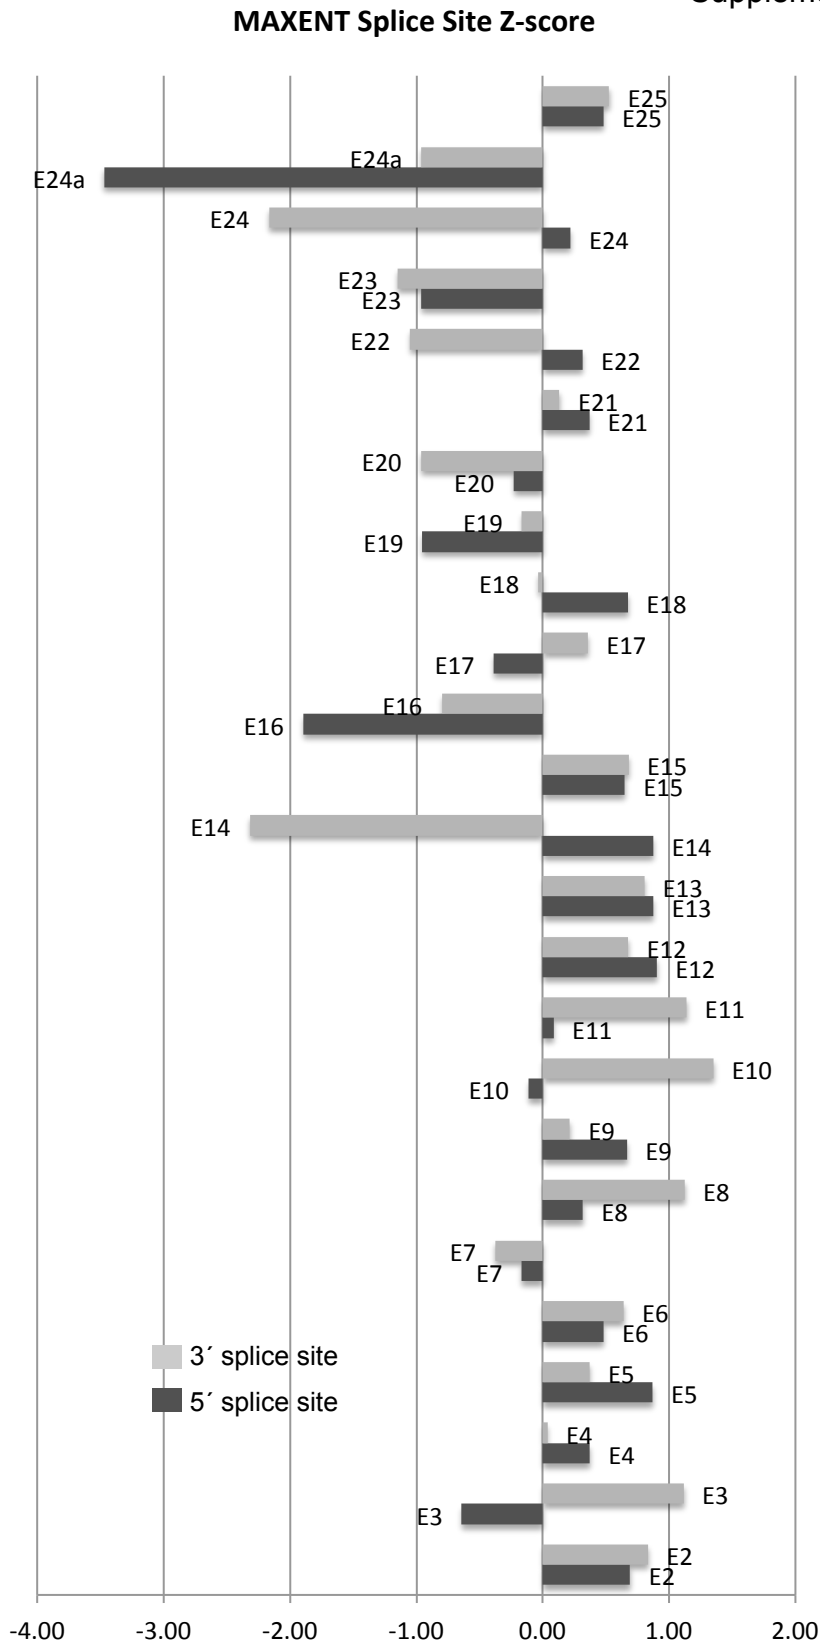

**Comparison of relative MAXENT splice site z-scores across the CASK gene.** Relative z-scores were calculated for the 3' (light grey) and 5' (dark grey) MAXENT splice site values of all annotated exons of the CASK gene in addition to the newly identified E24a. Negative z-scores indicate splice sites with values less than the mean and positive z-scores indicate splice sites with values greater than the mean.
