# Supplementary material for: Alternative Splicing of a Novel Inducible Exon Diversifies the CASK Guanylate Kinase Domain
Source: Hindawi journal article supplement (doi:10.1155/2012/816237), 2012-01-01

Supplementary Figure S4

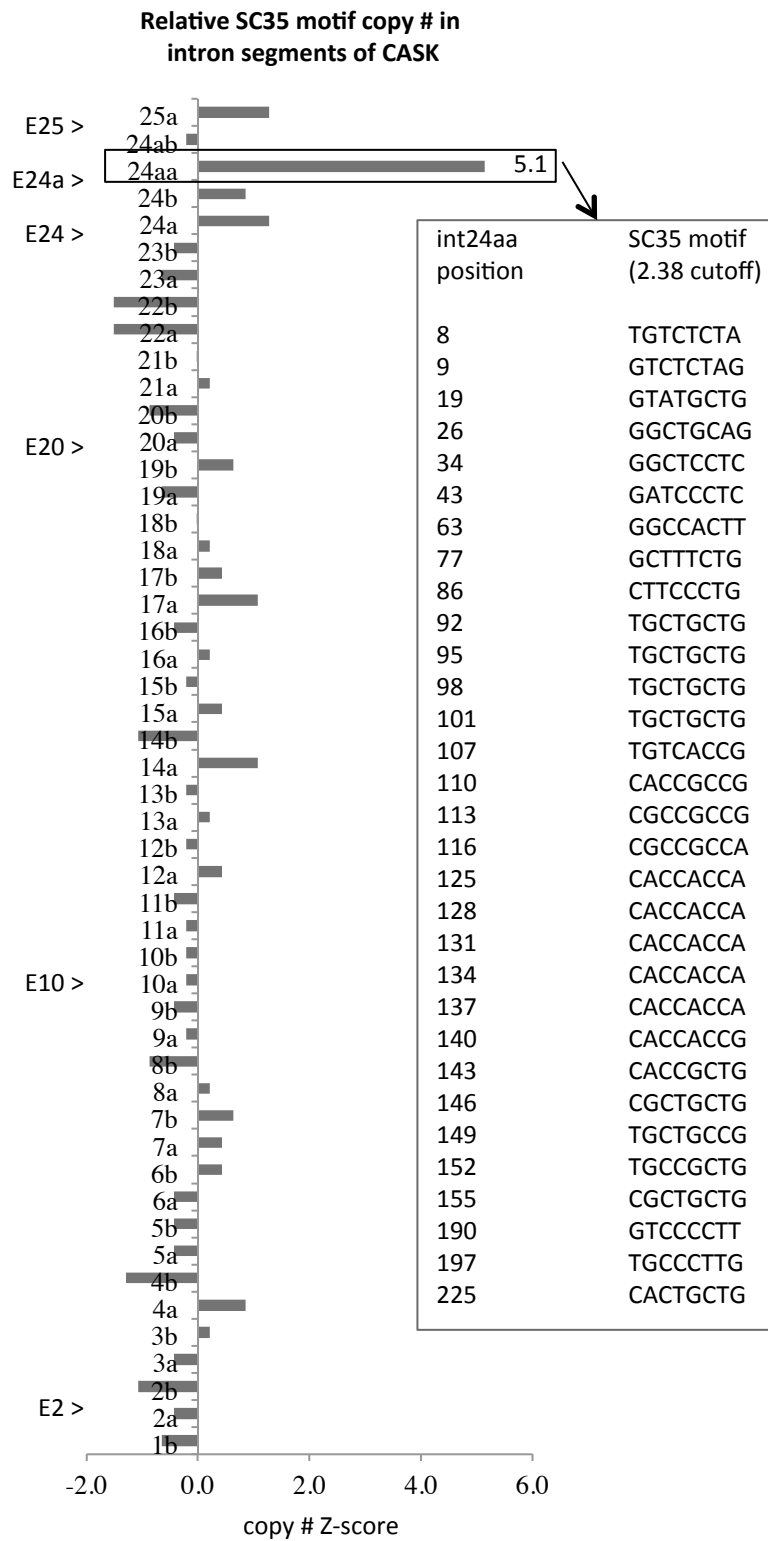

Supplement: f4 [file 816237.f4.pdf]
